# Supplementary material for: High performance N-doped carbon nanosheet/MnO2 cathode derived from bacterial cellulose for aqueous Zn-ion batteries
Source: Royal Society of Chemistry journal article supplement (doi:10.1039/d3ta01487h), 2023-01-01
Supplement: d3ta01487h1.pdf [file d3ta01487h1.pdf]

## Supporting Information

### **High performance N-doped carbon nanosheet/MnO<sub>2</sub> cathode derived from bacterial cellulose for aqueous Zn-ion batteries**

Wenhai Wang<sup>a,b</sup>, Ashley P. Black<sup>b</sup>, Cheng Liu<sup>b</sup>, Vlad Martin-Diaconescu<sup>c</sup>, Laura Simonelli<sup>c</sup>, Dino Tonti<sup>b\*</sup>

<sup>a</sup>Institute of Clean Energy and Advanced Nanocatalysis (iClean), School of Chemistry and Chemical Engineering, Anhui University of Technology, Maanshan 243002, China

<sup>b</sup>Institut de Ciència de Materials de Barcelona, Consejo Superior de Investigaciones Científicas (ICMAB-CSIC), Campus UAB, ES 08193 Bellaterra, Barcelona, Spain

<sup>c</sup>ALBA Synchrotron Light Source, 08290 Cerdanyola del Vallès, Barcelona, Spain

\*Corresponding author.

E-mail address: [dino.t@csic.es](mailto:dino.t@csic.es) (D. Tonti)

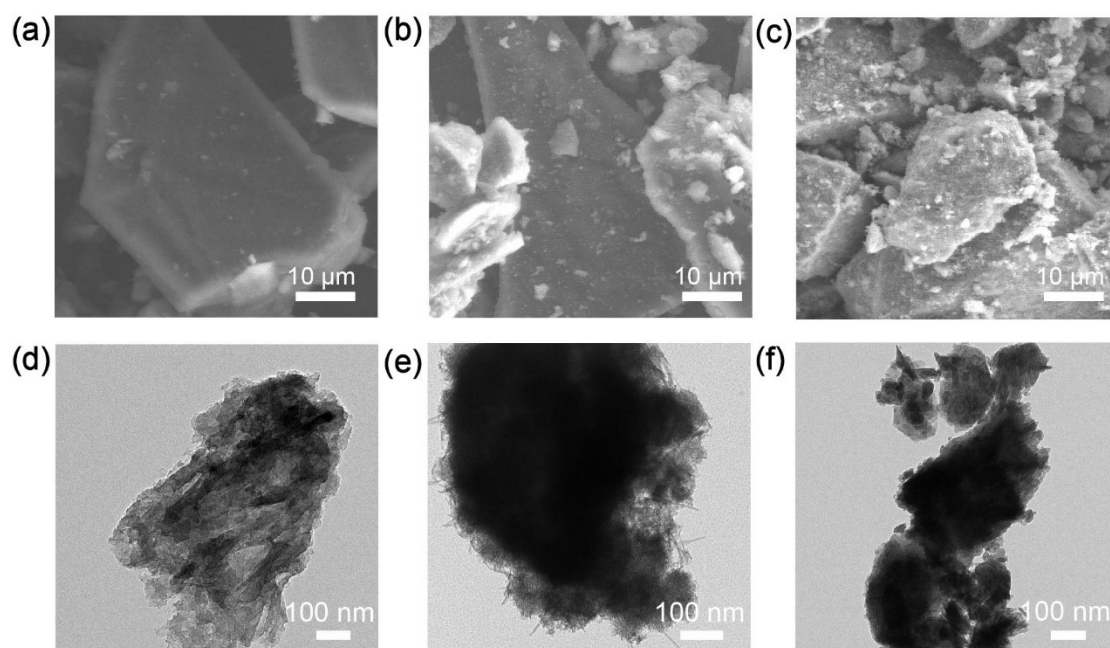

**Fig. S1.** SEM images of Carbon-w (a), C/MnO<sub>2</sub> (b), Commercial MnO<sub>2</sub> (c). TEM images of Carbon-w (d), C/MnO<sub>2</sub> (e), Commercial MnO<sub>2</sub> (f).

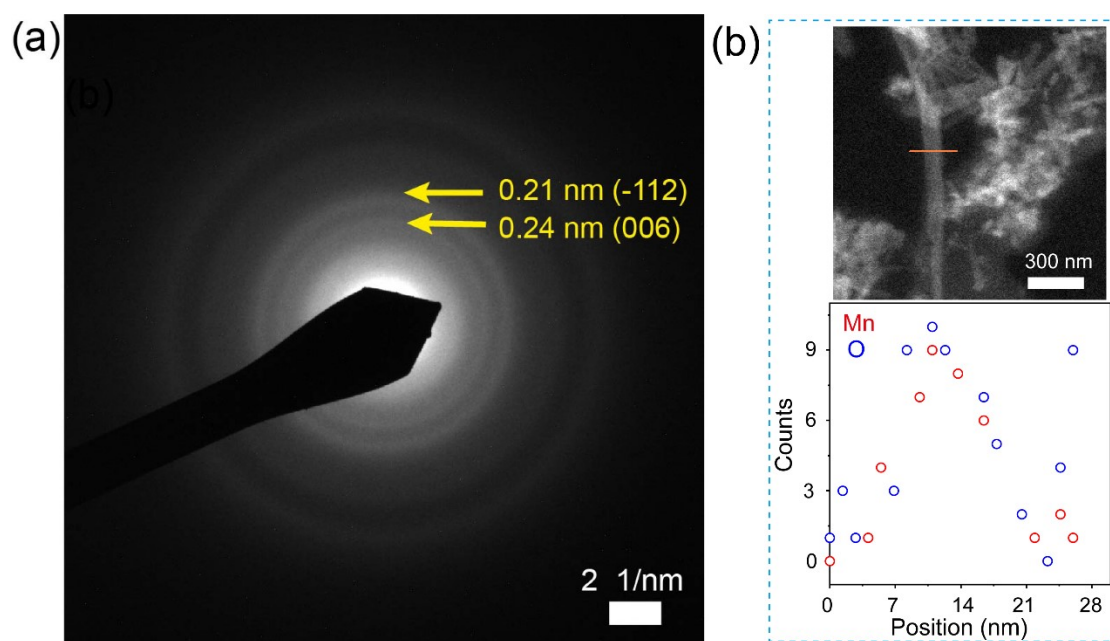

**Fig. S2.** Transmission electron microscopy of NCS/MnO<sub>2</sub>. (a) Selected area electron diffraction (SAED) in the region of Figure 1e. (b) EDS elemental line profiles.

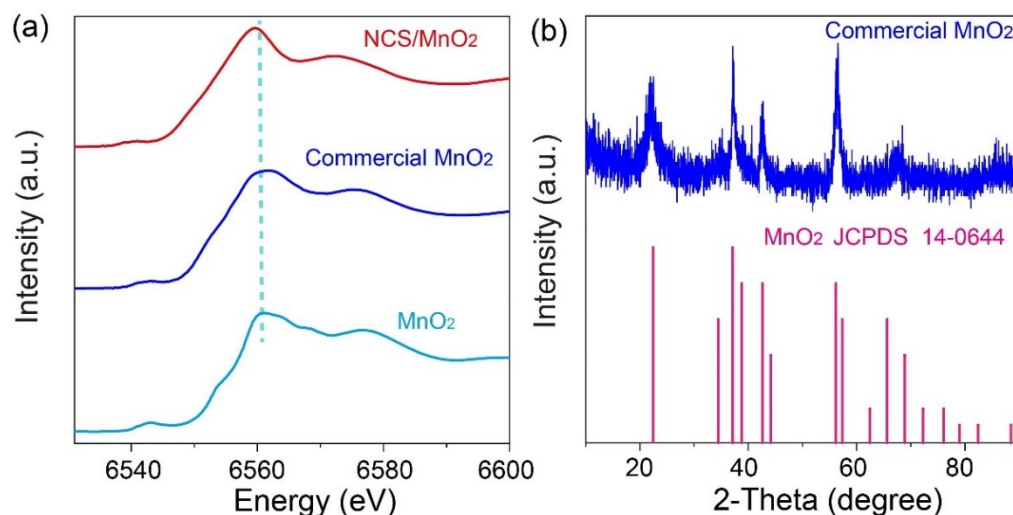

**Fig. S3** (a) XAS of NCS/MnO<sub>2</sub>, commercial MnO<sub>2</sub> and reference MnO<sub>2</sub>; (b) XRD pattern of commercial MnO<sub>2</sub>.

Although the energy position of Mn peak for commercial MnO<sub>2</sub> is also close to reference MnO<sub>2</sub>, there are some small difference (shape and energy position) of Mn peaks between commercial MnO<sub>2</sub> and reference MnO<sub>2</sub>. Probably because the synthetic methods of MnO<sub>2</sub> for suppliers are various, which affect Mn's chemical environment.

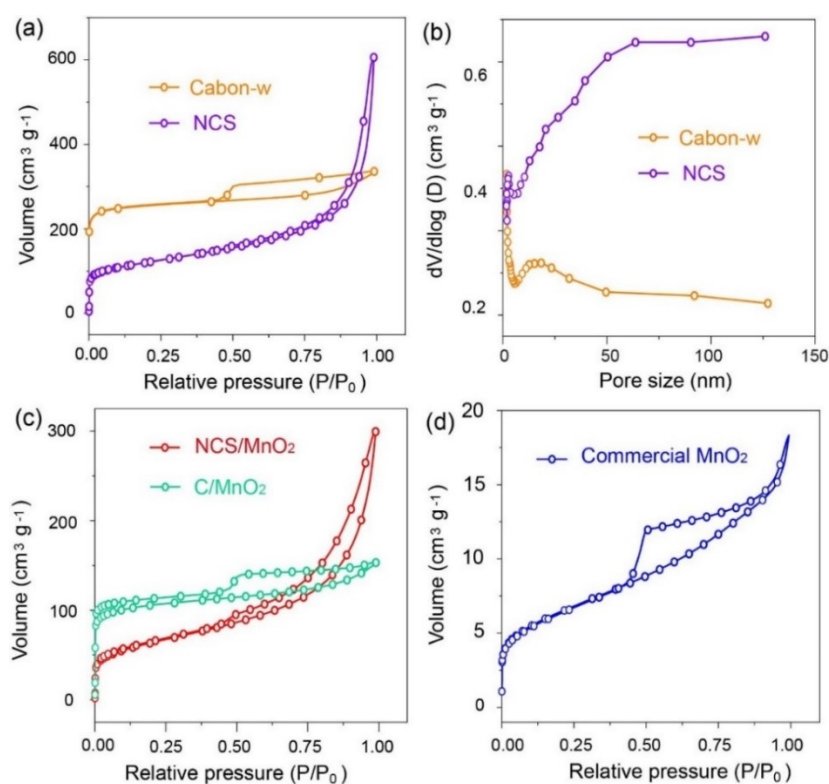

**Fig. S4.** (a) Nitrogen adsorption-desorption of NCS and carbon-w; (b) pore size distribution of NCS and carbon-w; (c) nitrogen adsorption-desorption of NCS/MnO<sub>2</sub> and C/MnO<sub>2</sub>; (d) nitrogen adsorption-desorption of commercial MnO<sub>2</sub>.

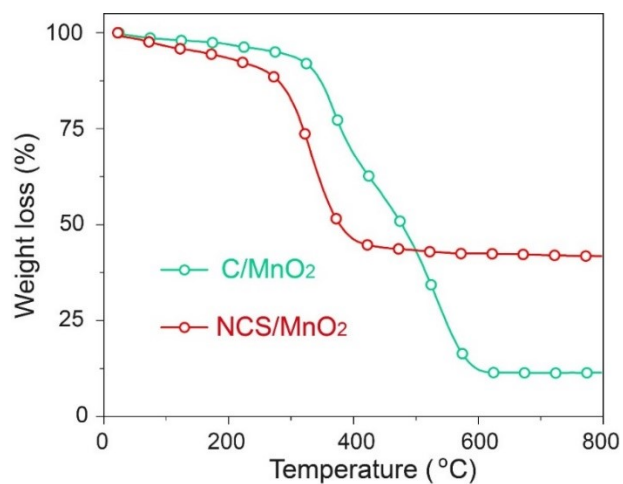

**Fig. S5.** TG curves of NCS/MnO<sub>2</sub> and C/MnO<sub>2</sub> in synthetic air flow.

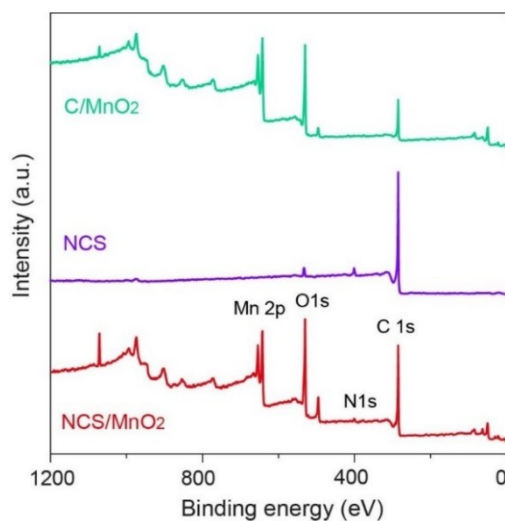

**Fig. S6.** Full XPS spectra of NCS/MnO<sub>2</sub>, NCS and C/MnO<sub>2</sub>

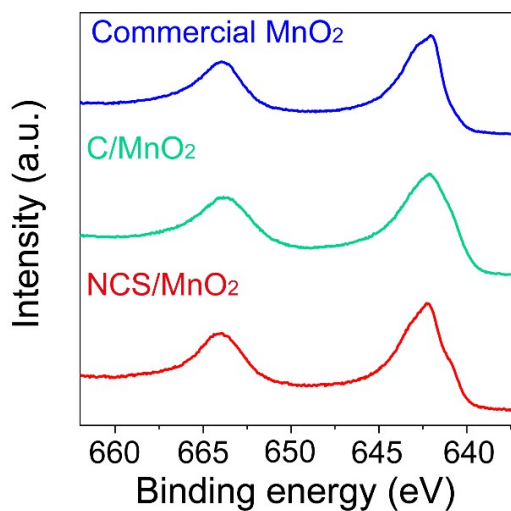

**Fig. S7.** Complete high-resolution XPS spectra of Mn 2p of NCS/MnO<sub>2</sub>, NCS and C/MnO<sub>2</sub>.

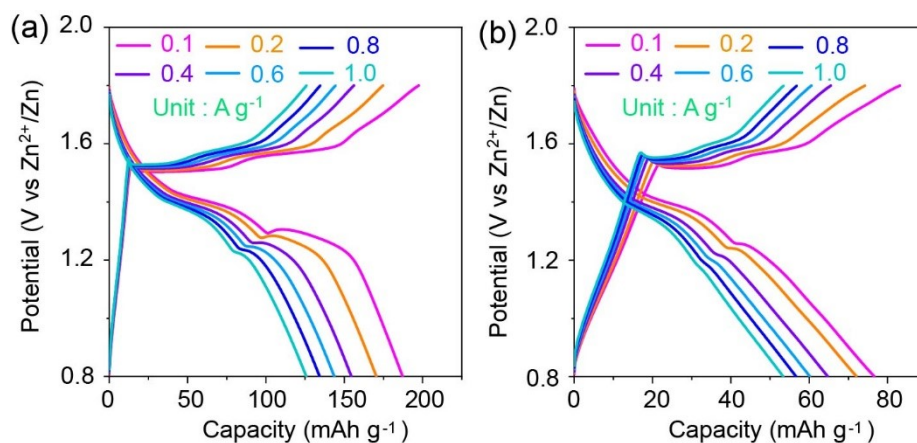

**Fig. S8.** Galvanostatic discharge/charge profiles of (a) Commercial  $\text{MnO}_2$  and (b) C/ $\text{MnO}_2$  at different current densities.

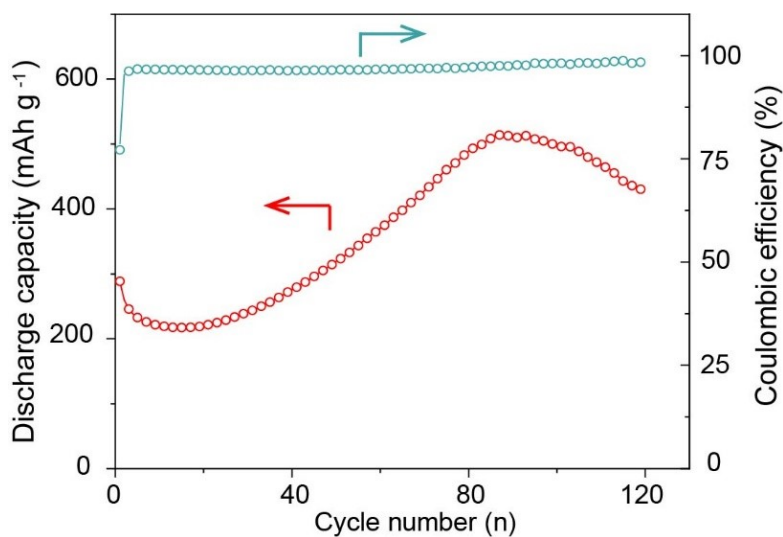

**Fig. S9.** Extended NCS/ $\text{MnO}_2$  cycling performance at  $0.2 \text{ A g}^{-1}$ .

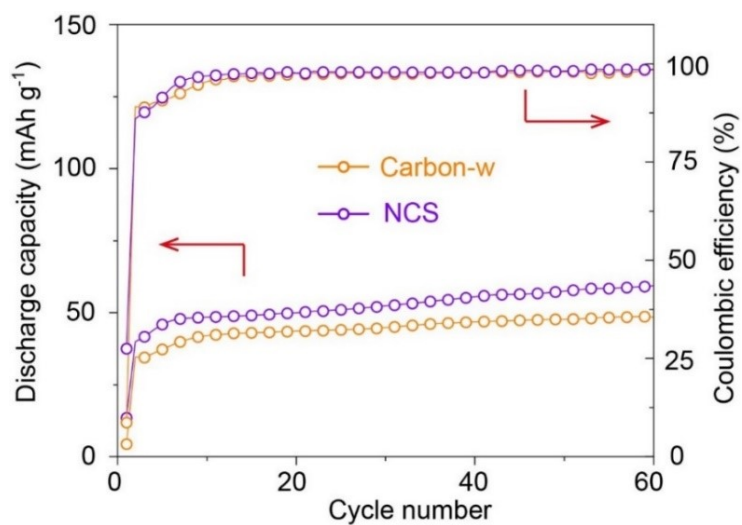

**Fig. S10.** Cycling performance of NCS and carbon-w at  $0.2 \text{ A g}^{-1}$ .

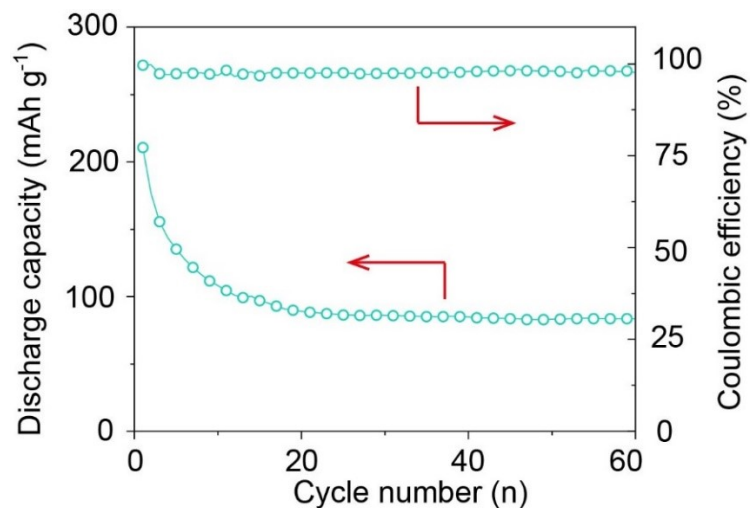

**Fig. S11.** Cycling performance of NCS/MnO<sub>2</sub> at 0.2 A g<sup>-1</sup> with 2 M ZnSO<sub>4</sub>.

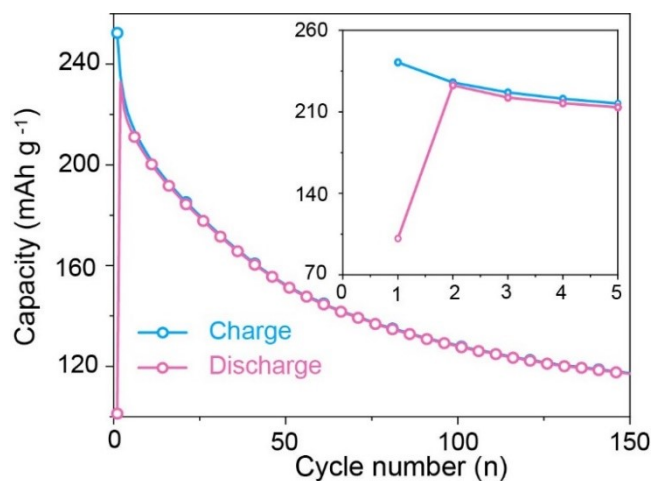

**Fig. S12.** The discharge and charge capacity of NCS/MnO<sub>2</sub> at 2 A g<sup>-1</sup> during the early stage. Insert: during the initial 5 cycles.

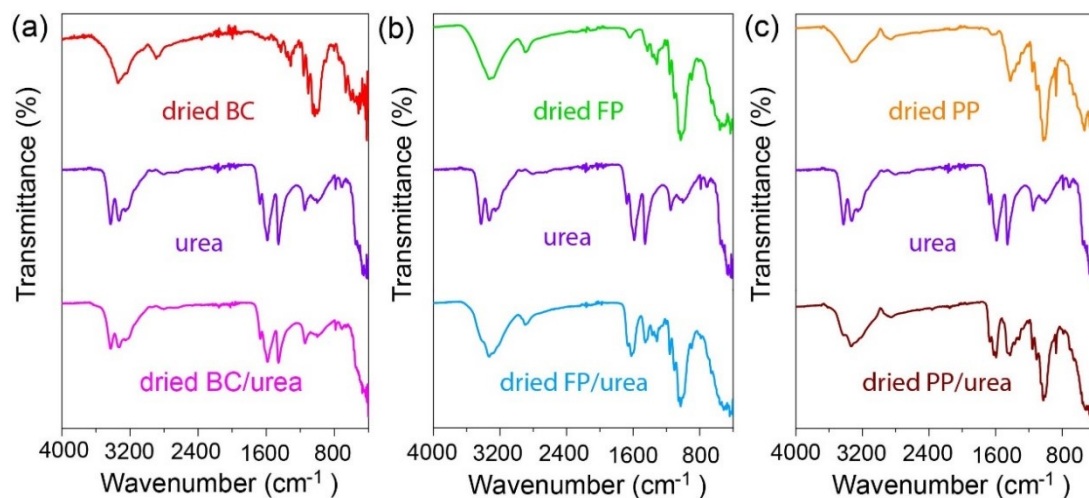

**Fig. S13.** FTIR of (a) dried BC, urea and dried BC/urea (b) dried FP, urea and dried FP/urea, (c) dried PP, urea and dried PP/urea

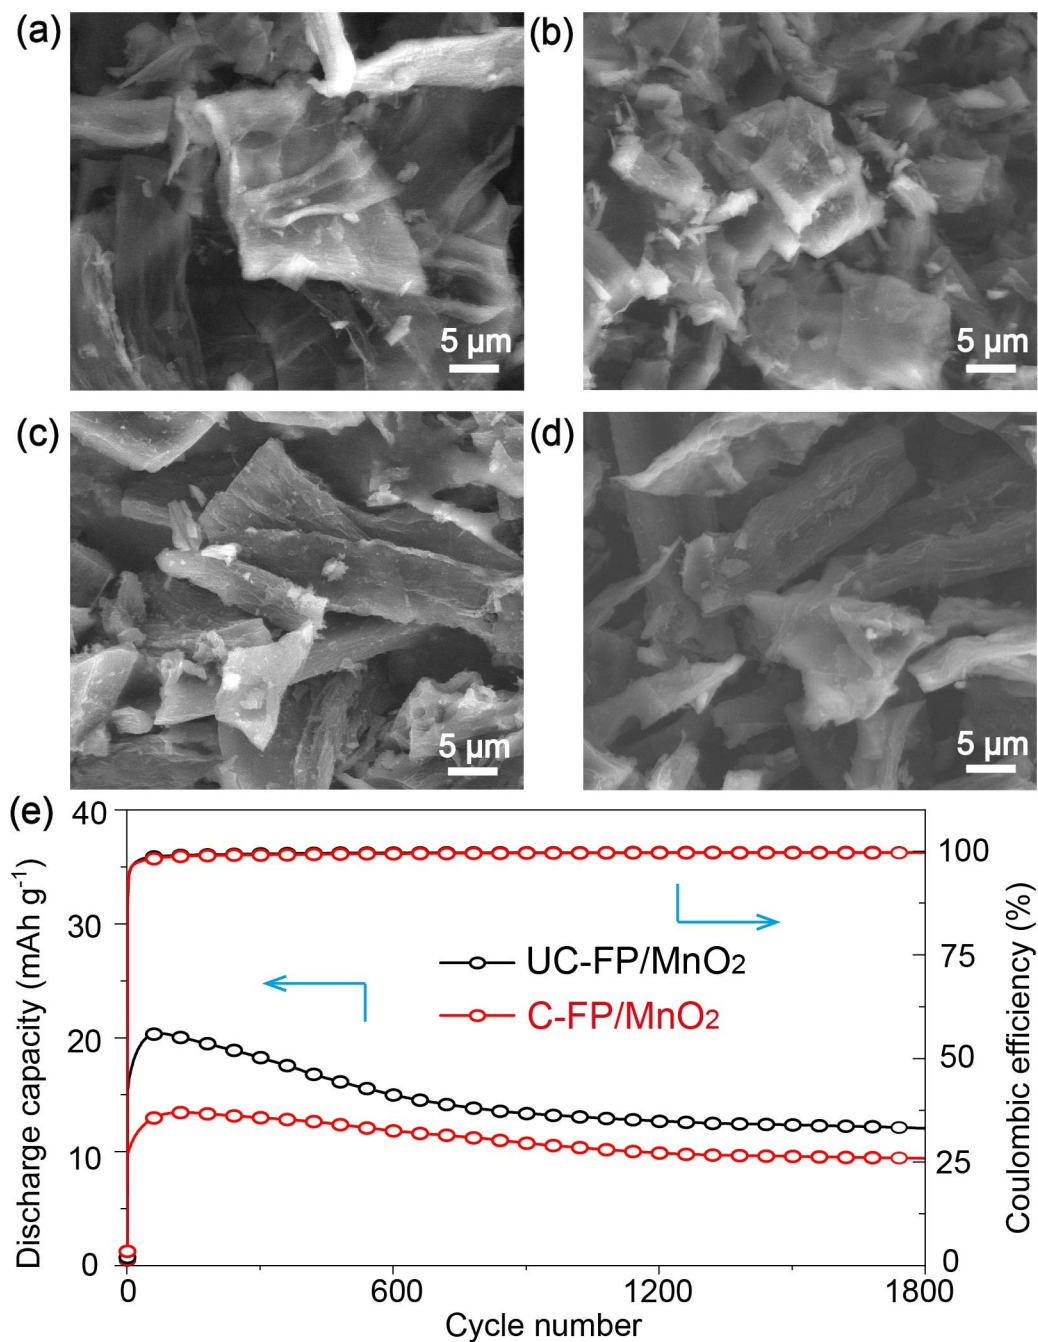

**Fig. S14.** Comparison of carbons from urea-treated (UC) and untreated (C) filter paper (FP). SEM images of (a) C-FP, (b) UC-FP, (c) C-FP/MnO<sub>2</sub> and (d) UC-FP/MnO<sub>2</sub>. (e) Cycling performance of C-FP/MnO<sub>2</sub> and (d) UC-FP/MnO<sub>2</sub> at 2 A g<sup>-1</sup>.

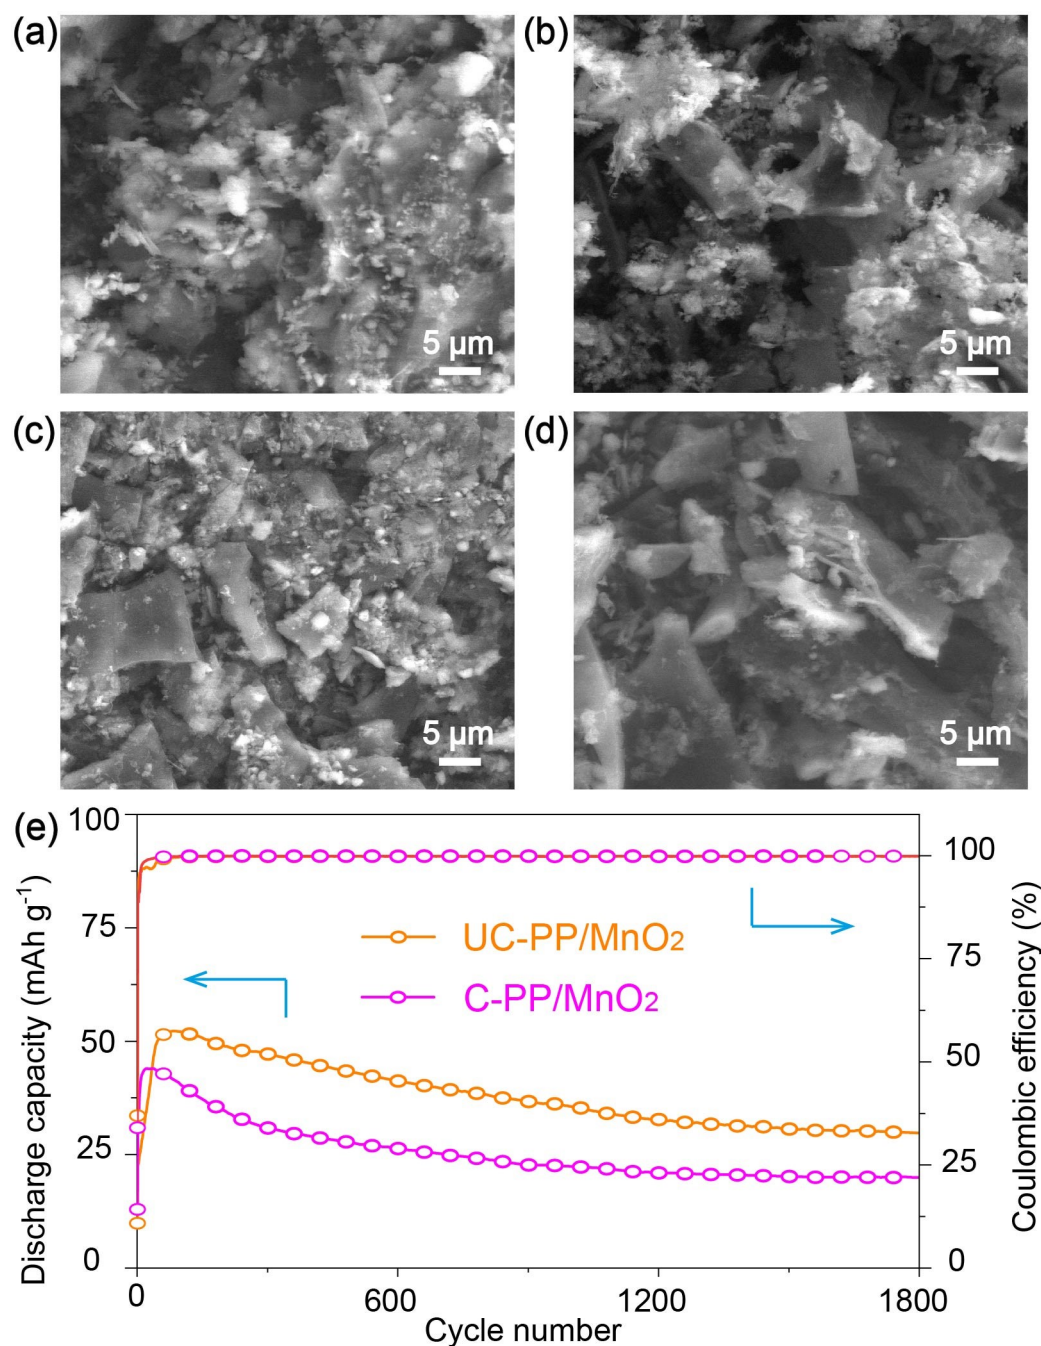

**Fig. S15.** Comparison of carbons from urea-treated (UC) and untreated (C) printer paper (PP). SEM images of (a) C-PP, (b) UC-PP, (c) C-PP/MnO<sub>2</sub> and (d) UC-PP/MnO<sub>2</sub>. (e) Cycling performance of C-PP/MnO<sub>2</sub> and UC-PP/MnO<sub>2</sub> at 2 A g<sup>-1</sup>.

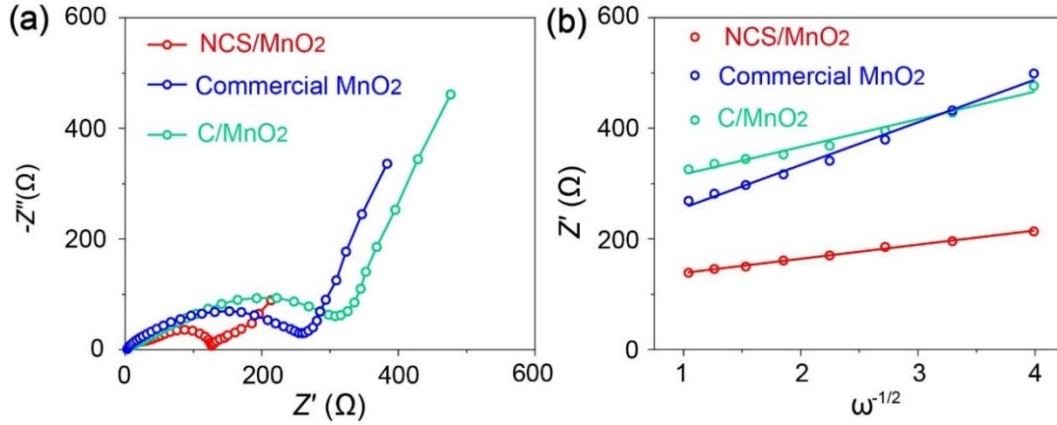

**Fig. S16.** (a) Nyquist plots at the open circuit voltage and (b) linear fits between  $Z'$  and  $\omega^{-1/2}$  for NCS/MnO<sub>2</sub>, C/MnO<sub>2</sub> and Commercial MnO<sub>2</sub>.

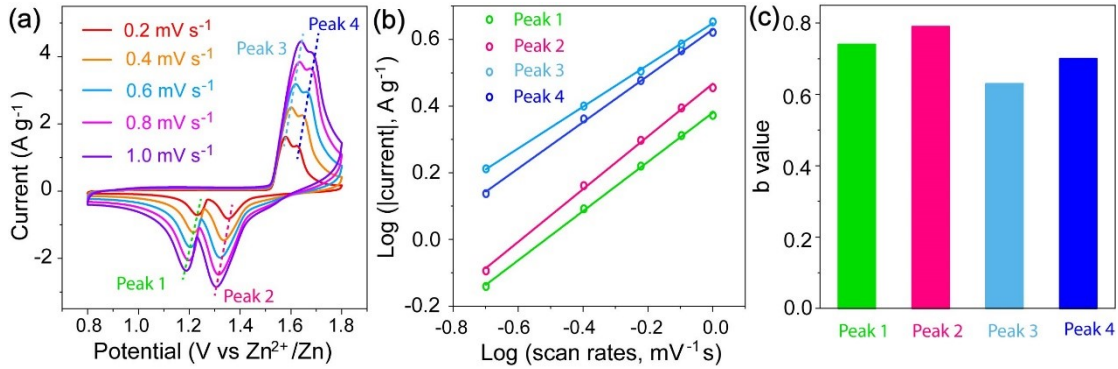

**Fig. S17.** (a) CV curves of NCS/MnO<sub>2</sub> at various scan rates. (b) relation between  $\log i$  and  $\log v$ . (c) the obtained b-values for the four peaks.

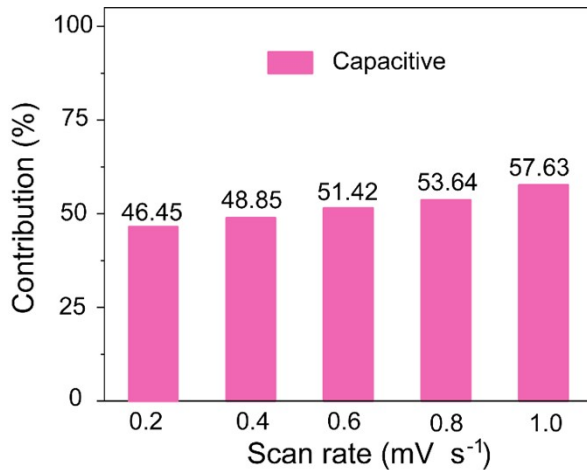

**Fig. S18.** Fractions of capacitive-like contributions to current for NCS/MnO<sub>2</sub> in CVs at different scan rates.

Generally the measured current ( $i$ ) at a certain potential is consisted of the capacitive current ( $k_1v$ ) and the diffusion current ( $k_2v^{1/2}$ ):  $i = k_1v + k_2v^{1/2}$ . The value of  $k_1$  and  $k_2$  at a certain potential was obtained by fitting. The capacitive-like contribution is the integral area ratio between potential- $k_1v$  curves and potential- $i$  curves.

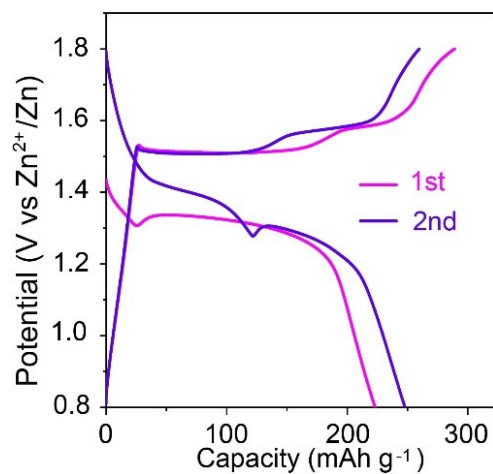

**Fig. S19.** Galvanostatic discharge/charge profiles of NCS/MnO<sub>2</sub> during the initial two cycles at 0.2 A g<sup>-1</sup>.

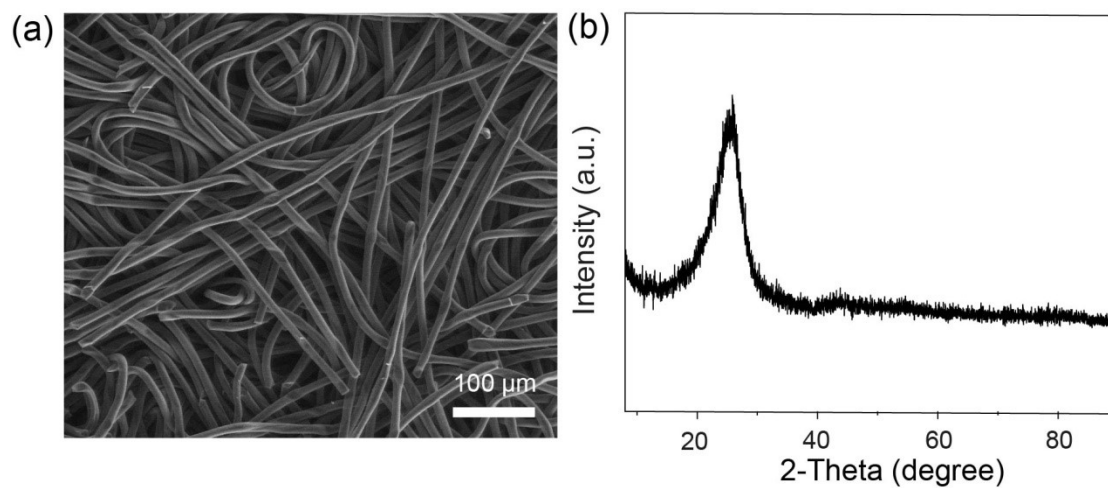

**Fig. S20.** (a) SEM image and (b) XRD pattern of bare carbon paper.

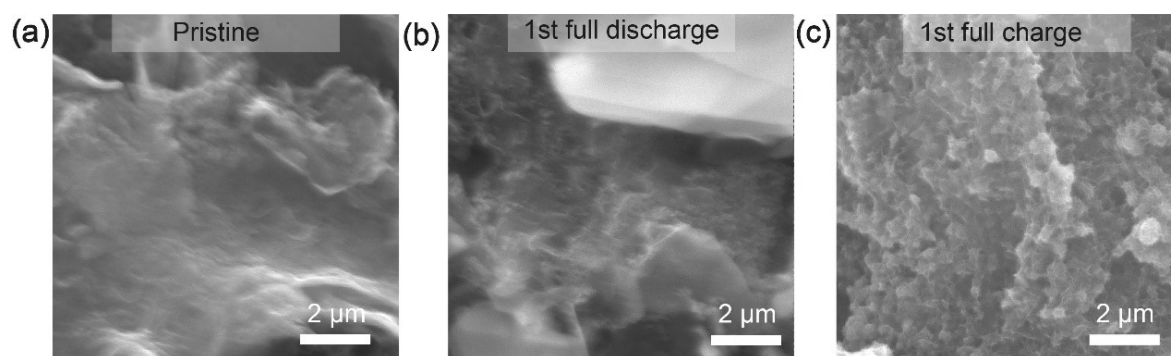

**Fig. S21.** SEM images of the 1st cycle for NCS/MnO<sub>2</sub>.

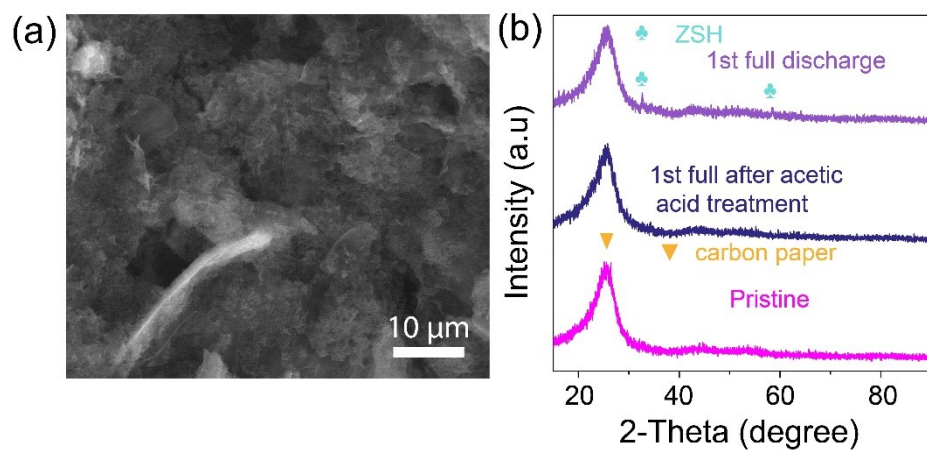

**Fig. S22.** SEM of the 1st discharge to 0.8 V of the NCS/MnO<sub>2</sub> electrode after acetic acid treatment (a); and comparison of XRD patterns (b).

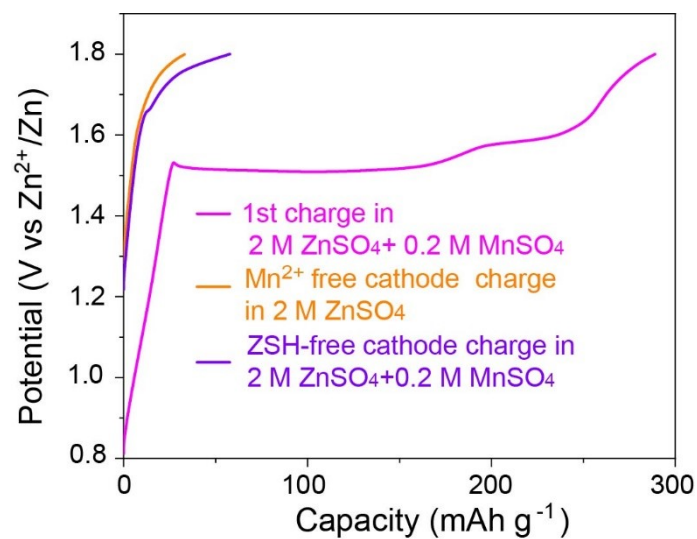

**Fig. S23.** Charge profiles for NCS/MnO<sub>2</sub> in presence of different chemical species.

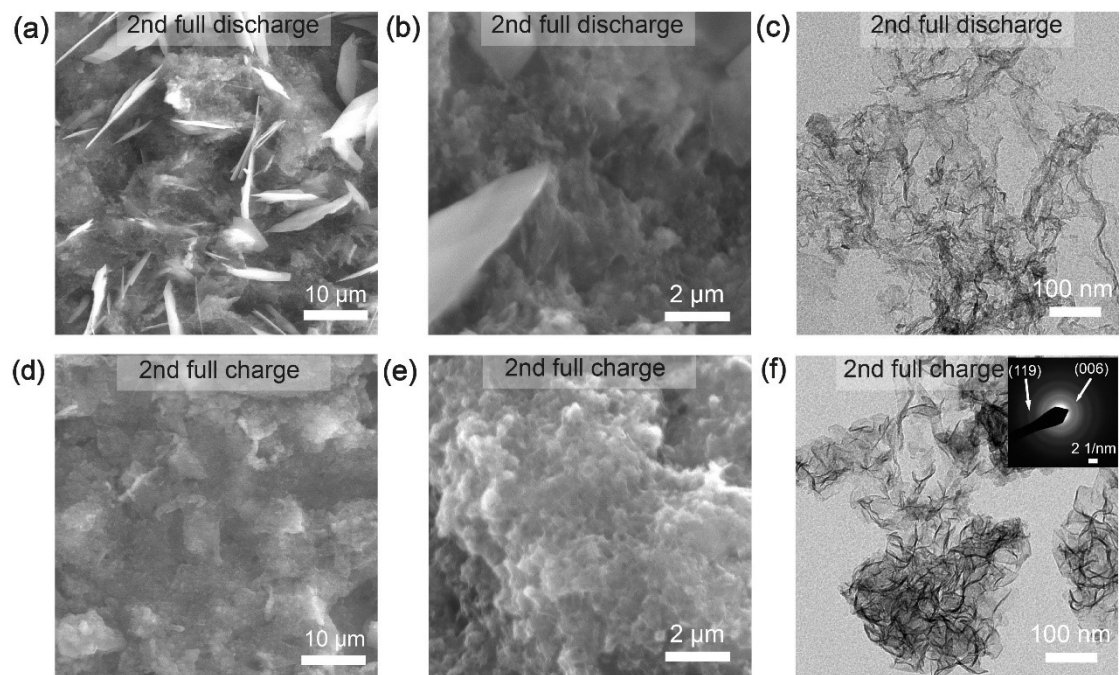

**Fig. S24.** SEM and TEM images at the 2nd cycle for NCS/MnO<sub>2</sub>.

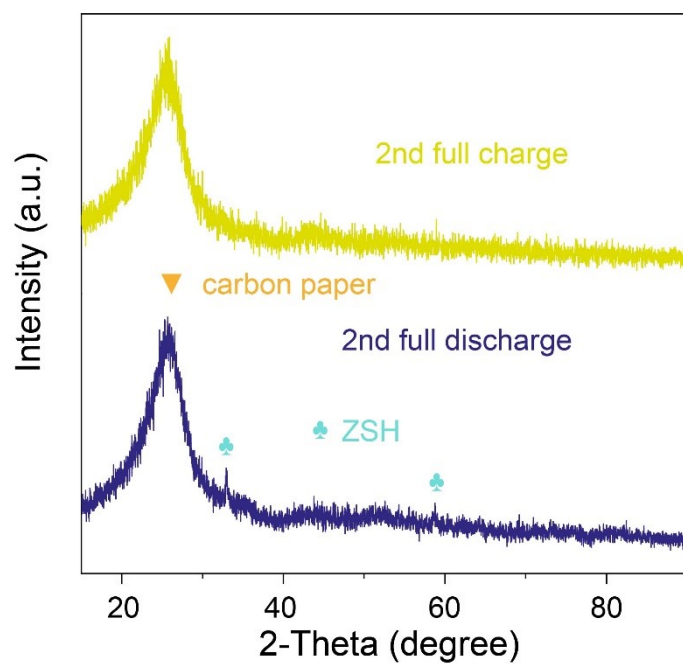

**Fig. S25.** XRD patterns of the 2nd cycle for NCS/MnO<sub>2</sub> at 0.2 A g<sup>-1</sup>.

**Table S1.** Textural data of samples.

| Samples                     | BET surface area (m <sup>2</sup> g <sup>-1</sup> ) | External surface area (m <sup>2</sup> g <sup>-1</sup> ) | Pore volume (cm <sup>3</sup> g <sup>-1</sup> ) |
|-----------------------------|----------------------------------------------------|---------------------------------------------------------|------------------------------------------------|
| Carbon-w <sup>2</sup>       | 1009                                               | 153                                                     | 0.19                                           |
| NCS                         | 431                                                | 269                                                     | 0.86                                           |
| C/MnO <sub>2</sub>          | 401                                                | 112                                                     | 0.12                                           |
| NCS/MnO <sub>2</sub>        | 229                                                | 183                                                     | 0.42                                           |
| Commercial MnO <sub>2</sub> | 23                                                 | 20                                                      | 0.02                                           |

**Table S2.** Fraction of Mn<sup>3+</sup> component with respect to the total Mn 2p<sub>3/2</sub> area measured by XPS. Fits were obtained by adopting for Mn<sup>3+</sup> and Mn<sup>4+</sup> the multiplet shapes obtained by Ilton et al.<sup>3</sup>. For all components of both multiplets the same intensities and relative binding energies were maintained as reported in Ref. 2, and a fixed Gauss/Lorentz mixing factor of 0.5 was used.

| Samples                   | NCS/MnO <sub>2</sub> | C/MnO <sub>2</sub> | Commercial MnO <sub>2</sub> |
|---------------------------|----------------------|--------------------|-----------------------------|
| Mn <sup>3+</sup> fraction | 0.60                 | 0.91               | 0.26                        |

**Table S3.** Comparison the cycling performance between NCS/MnO<sub>2</sub> and reported cathodes for aqueous zinc ion batteries.

| Cathode                                                                            | Cycling performance                                               | References                                                       |
|------------------------------------------------------------------------------------|-------------------------------------------------------------------|------------------------------------------------------------------|
| NCS/MnO <sub>2</sub>                                                               | 114 mAh g <sup>-1</sup> at 2 A g <sup>-1</sup> after 1800 cycles  | This work                                                        |
| MnOx@N-C                                                                           | 100 mAh g <sup>-1</sup> at 2 A g <sup>-1</sup> after 1600 cycles  | <i>Adv Energy Mater.</i> 2018, <b>8</b> 1801445.                 |
| carbon coated MnO                                                                  | 116 mAh g <sup>-1</sup> at 1 A g <sup>-1</sup> after 1500 cycles  | <i>Energy Storage Mater.</i> 2020, <b>24</b> , 394-401.          |
| Co-Mn <sub>3</sub> O <sub>4</sub> /carbon nanosheet array                          | 103 mAh g <sup>-1</sup> at 2 A g <sup>-1</sup> after 1100 cycles  | <i>Adv Energy Mater.</i> 2021, <b>11</b> , 2003203               |
| ZnMn <sub>2</sub> O <sub>4</sub> microrods                                         | 49 mAh g <sup>-1</sup> at 2 A g <sup>-1</sup> after 1000 cycles   | <i>Energy Storage Mater.</i> 2020, <b>28</b> , 407-417.          |
| MoS <sub>2</sub>                                                                   | 102 mAh g <sup>-1</sup> at 0.5A g <sup>-1</sup> after 600 cycles  | <i>Energy Storage Mater.</i> 2019, <b>16</b> , 527-534.          |
| Ocu-Mn <sub>2</sub> O <sub>3</sub>                                                 | 112 mAh g <sup>-1</sup> at 1 A g <sup>-1</sup> after 600 cycles   | <i>ACS Appl Mater Interfaces.</i> 2020, <b>12</b> , 28199        |
| Na <sub>0.44</sub> MnO <sub>2</sub>                                                | ~37 mAh g <sup>-1</sup> at 1 A g <sup>-1</sup> after 800 cycles   | <i>ACS Sustainable Chem Eng.</i> 2020, <b>8</b> , 10673-10681.   |
| Zn <sub>3</sub> V <sub>2</sub> O <sub>7</sub> (OH) <sub>2</sub> ·2H <sub>2</sub> O | 101 mAh g <sup>-1</sup> at 0.2 A g <sup>-1</sup> after 300 cycles | <i>Adv Mater.</i> 2018, <b>30</b> , 1705580.                     |
| α-(Mn <sub>2</sub> O <sub>3</sub> –MnO <sub>2</sub> )-500                          | 95 mAh g <sup>-1</sup> at 2 A g <sup>-1</sup> after 800 cycles    | <i>ACS Appl Mater Interfaces.</i> 2020, <b>12</b> , 32526-32535. |

**Table S4.** Masses of different substrates and urea absorbed after drying

| Substrate                                               | BC    | FP    | PP    |
|---------------------------------------------------------|-------|-------|-------|
| Absorbed urea mass (g cm <sup>-2</sup> )                | 0.15  | 0.004 | 0.005 |
| Bare substrates (g cm <sup>-2</sup> )                   | 0.006 | 0.009 | 0.008 |
| Mass ratio between the absorbed urea/the bare substrate | 25    | 0.4   | 0.6   |

**Reference**

- 1 S. Bi, Y. Wu, A. Cao, J. Tian, S. Zhang and Z. Niu, *Mater. Today Energy*, 2020, **18**, 100548.
- 2 W. Wang, S. Khabazian, S. Roig-Sanchez, A. Laromaine, A. Roig and D. Tonti, *Renew. Energ.*, 2021, **177**, 209-215.
- 3 E. S. Ilton, J. E. Post, P. J. Heaney, F. T. Ling and S. N. Kerisit, *Appl. Surf. Sci.*, 2016, **366**, 475-485.
